# Supplementary material for: Is the prolongation latency of visual evoked potentials a pathological sign in children with Down’s syndrome without ocular abnormalities? Case–control study of children with Down’s syndrome
Source: HighWire-hosted journal article supplement (doi:10.1136/bmjophth-2022-001074), 2023-03-01
Supplement: bmjophth-2022-001074supp001_data_supplement.pdf [file bmjophth-2022-001074supp001_data_supplement.pdf]

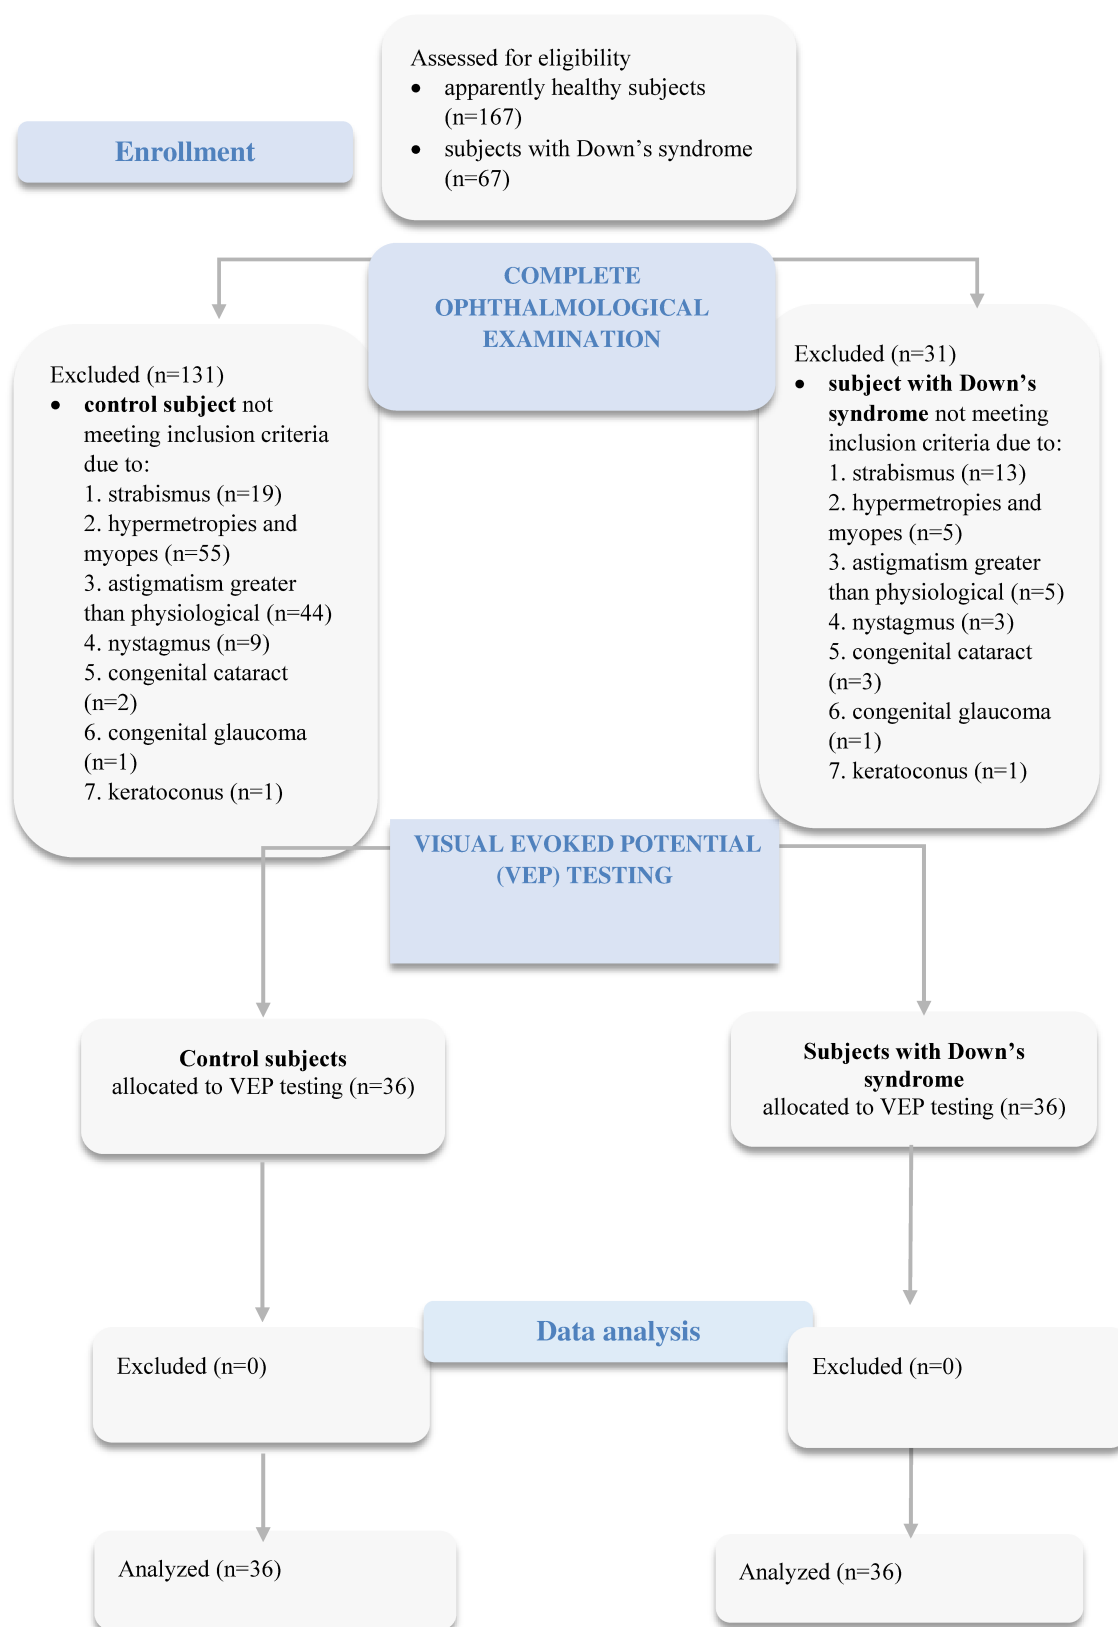

**Supplemental Figure 1.** Flow diagram showing the recruitment processes and study protocol

Supplemental Table 1. Average P100 parameters in children with Down syndrome and in healthy children

|                |              | Down syndrome | Healthy   |
|----------------|--------------|---------------|-----------|
|                |              | mean±SD       |           |
| Latencies (ms) | Left eye     | 115.6±0.7     | 104.2±4.7 |
|                | Right eye    | 115.7±0.6     | 104.2±4.7 |
| Amplitude (µV) | Left eye     | 11.4±1.7      | 12.0±2.0  |
|                | Right eye    | 11.9±1.8      | 12.0±1.9  |
| Latencies (ms) | VEP dominant | 115.4±0.7     | 102.3±5.9 |
|                | VEP inferior | 115.9±0.6     | 106.1±1.5 |
| Amplitude (µV) | VEP dominant | 12.7±1.8      | 12.7±1.9  |
|                | VEP inferior | 11.2±1.7      | 11.1±1.8  |

*VEP dominant eye was defined as an eye which exhibited: higher P100 amplitude, and P100 latency that was either shorter or equal to the value of the other eye.*

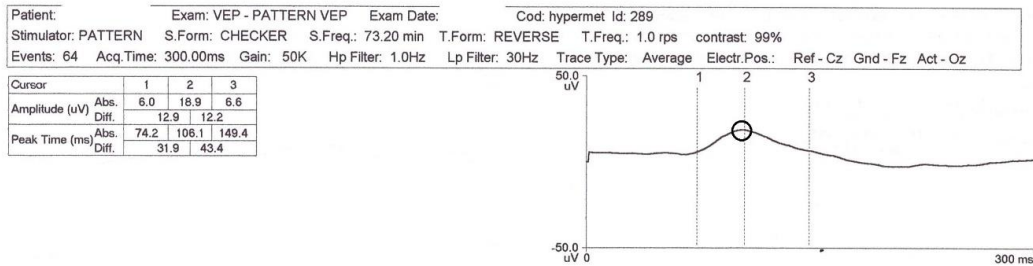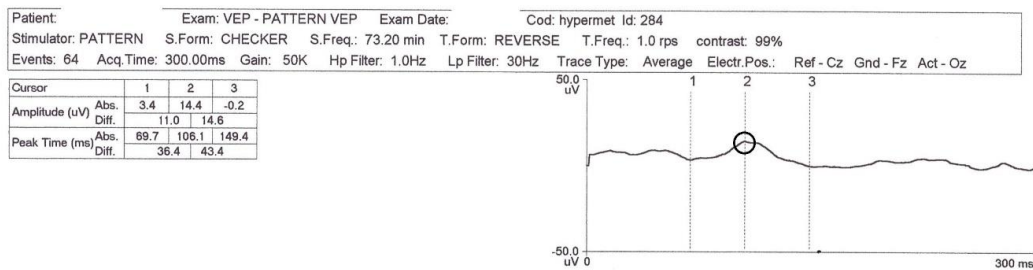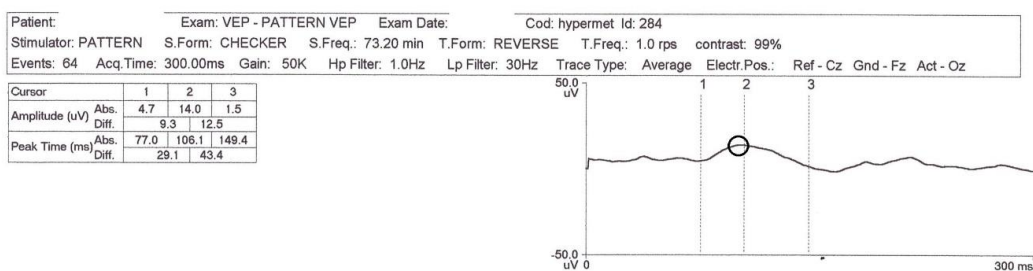

## Supplemental Figure 2 VEP recordings of healthy children

The peaks used to measure latency and amplitude are marked by a circle.

Three VEP recordings represent three distinct participants

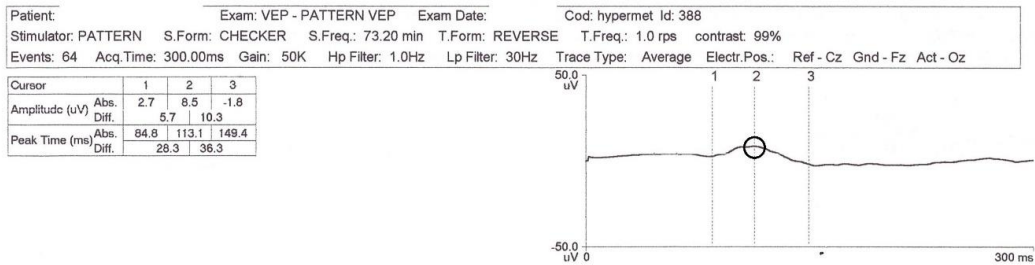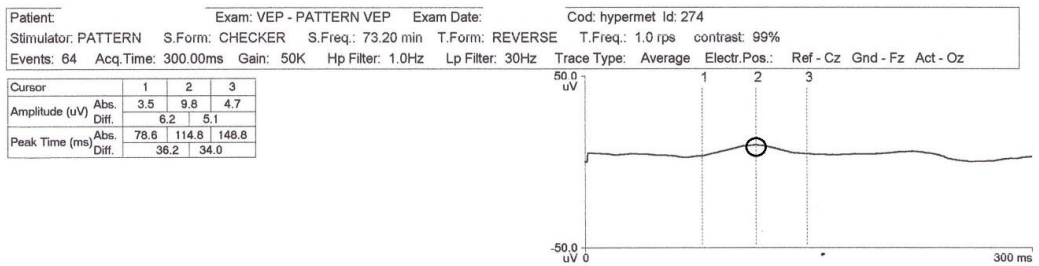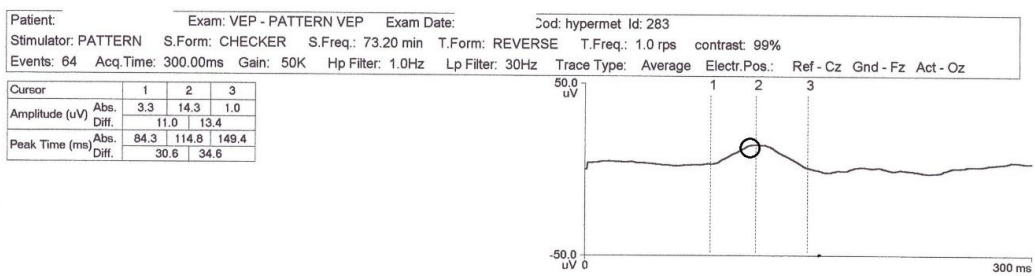

**Supplemental Figure 3.** VEP recordings of Down syndrome

The peaks used to measure latency and amplitude are marked by a circle.

Three VEP recordings represent three distinct participants
